# Supplementary material for: Degradation of CP4-EPSPS with a Psychrophilic Bacterium Stenotrophomonas maltophilia 780
Source: MDPI journal article supplement (doi:10.3390/biom12020318), 2022-02-17
Supplement: s1 [file s1]

# Supplementary information for “Degradation of CP4-EPSPS with a psychrophilic bacterium *Stenotrophomonas maltophilia* 780”

**Figure S1. The sequence of CP4-EPSPS**

5'TTTTGACGTTACCGACAGAATAAGCACCGGCTAACTCTGTGCCAGCAGCCGCGGTAATACAGAGGGTGCAAGCGT  
TAATCGGAATTACTGGGCGTAAAGCGCGCGTAGGTGGTTTGTAAAGTTGGATGTGAAATCCCCGGGCTCAACCTGGG  
AACTGCATCCAAAAGTGGCAAGCTAGAGTATGGTAGAGGGTGGTGAATTCCTGTGTAGCGGTGAAATGCGTAGA  
TATAGGAAGGAACACCAAGTGGCGAAGGCGACCACTGGACTGATACTGACACTGAGGTGCGAAAGCGTGGGGAGC  
AAACAGGATTAGATACCCTGGTAGTCCACGCCGTAAACGATGTCAACTAGCCGTTGGGAGCCTTGAGCTCTTAGTGG  
CGCAGCTAACGCATTAAGTTGACCGCCTGGGGAGTACGGCCGCAAGGTTAAACTCAAATGAATTGACGGGGGCC  
GCACAAGCGGTGGAGCATGTGGTTTAATTCGAAGCAACGCGAAGAACCTTACCAGGCCTTGACATCCAATGAACCT  
TCCAGAGATGGATTGGTGCCTTCGGGAACATTGAGACAGGTGCTGCATGGCTGTCGTCAGCTCGTGTGCTGAGATGT  
TGGGTAAAGTCCCGTAACGAGCGCAACCCCTTGCCTTAGTTACCAGCACGTAATGGTGGGCACTCTAAGGAGACTGC  
CGGTGACAAACCGGAGGAAGGTGGGGATGACGTCAAGTCATCATGGCCCTTACGGCCTGGGCTACACACGTGCTAC  
AATGGTCGGTACAAAGGGTTGCCAAGCCGCGAGGTGGAGCTAATCCATAAAACCGATCGTAGTCCGGATCGCAGT  
CTGCAACTCGACTGCGTGAAGTCGGAATCGCTAGTAATCGCGAATCAGAATGTCGCGGTGAATACGTTCCCGGGCCT  
TGTACACACCGCCCGTCACACCATGGGAGTGGGTTGCACCAGAAGTAGCTAGTCTAACCTTC-3'

Table S1. Strains obtained from CCTCC

| Serial number  | Molecular Taxonomy                  | Identity (%) | Geographical sources                 |
|----------------|-------------------------------------|--------------|--------------------------------------|
| CCTCC S2016780 | <i>Mucilaginibacter gotjawali</i>   | 97.38        | South Pole, Astronomical observatory |
| CCTCC S2016784 | <i>Pseudomonas mandelii</i>         | 99.64        | South Pole, Astronomical observatory |
| CCTCC S2016802 | <i>Massilia eurypsychrophila</i>    | 99.36        | South Pole, Astronomical observatory |
| CCTCC S2016808 | <i>Arthrobacter oryzae</i>          | 99.49        | South Pole, Astronomical observatory |
| CCTCC S2016809 | <i>Pseudomonas chlororaphis</i>     | 98.39        | South Pole, Astronomical observatory |
| CCTCC S2016709 | <i>Massilia eurypsychrophila</i>    | 98.10        | South Pole, the Larsemann Hills      |
| CCTCC S2016713 | <i>Arthrobacter oxydans</i>         | 98.45        | South Pole, Inexpressible Island     |
| CCTCC S2016714 | <i>Arthrobacter globiformis</i>     | 98.15        | South Pole, Inexpressible Island     |
| CCTCC S2016723 | <i>Arthrobacter oxydans</i>         | 98.73        | South Pole, Inexpressible Island     |
| CCTCC S2016730 | <i>Arthrobacter oxydans</i>         | 98.66        | South Pole, Inexpressible Island     |
| CCTCC S2016741 | <i>Pseudomonas marginalis</i>       | 99.7         | South Pole, Larsemann Hills          |
| CCTCC S2016742 | <i>Pseudomonas marginalis</i>       | 99.7         | South Pole, Larsemann Hills          |
| CCTCC S2016746 | <i>Sphingomonas oligophenolica</i>  | 98.6         | South Pole, Larsemann Hills          |
| CCTCC S2016754 | <i>Brevundimonas intermedia</i>     | 99.69        | South Pole, Larsemann Hills          |
| CCTCC S2016766 | <i>Sphingomonas asaccharolytica</i> | 98.4         | South Pole, Inexpressible Island     |
| CCTCC S2016769 | <i>Arthrobacter scleromae</i>       | 98.51        | South Pole, Inexpressible Island     |
| CCTCC S2016770 | <i>Arthrobacter oxydans</i>         | 98.51        | South Pole, Inexpressible Island     |
| CCTCC S2016771 | <i>Arthrobacter scleromae</i>       | 99.07        | South Pole, Inexpressible Island     |
| CCTCC S2016773 | <i>Arthrobacter globiformis</i>     | 97.95        | South Pole, Inexpressible Island     |
| CCTCC S2016774 | <i>Arthrobacter scleromae</i>       | 98.85        | South Pole, Inexpressible Island     |
| CCTCC S2016776 | <i>Arthrobacter oxydans</i>         | 98.37        | South Pole, Inexpressible Island     |

**Figure S2. The 16S rDNA alignment of *Pseudomonas* sp. 780**

Sequences producing significant alignments:

Select: [All](#) [None](#) Selected: 0

[Alignments](#) [Download](#) [GenBank](#) [Graphics](#) [Distance tree of results](#)

| Description                                                                                                                       | Max score | Total score | Query cover | E value | Perc. ident | Accession                  |
|-----------------------------------------------------------------------------------------------------------------------------------|-----------|-------------|-------------|---------|-------------|----------------------------|
| <input type="checkbox"/> <a href="#">Stenotrophomonas</a> sp. strain DT 16S ribosomal RNA gene, partial sequence                  | 2603      | 2603        | 100%        | 0.0     | 99.93%      | <a href="#">MH814356.1</a> |
| <input type="checkbox"/> <a href="#">Stenotrophomonas</a> sp. LY-2 gene for 16S ribosomal RNA, partial sequence                   | 2603      | 2603        | 100%        | 0.0     | 99.93%      | <a href="#">LC136883.1</a> |
| <input type="checkbox"/> <a href="#">Stenotrophomonas maltophilia</a> strain 7K14 16S ribosomal RNA gene, partial sequence        | 2603      | 2603        | 100%        | 0.0     | 99.93%      | <a href="#">KT825837.1</a> |
| <input type="checkbox"/> <a href="#">Stenotrophomonas maltophilia</a> R551-3, complete genome                                     | 2603      | 10395       | 100%        | 0.0     | 99.93%      | <a href="#">CP001111.1</a> |
| <input type="checkbox"/> <a href="#">Uncultured bacterium</a> clone KRA30-21 16S ribosomal RNA gene, partial sequence             | 2603      | 2603        | 100%        | 0.0     | 99.93%      | <a href="#">AY081992.1</a> |
| <input type="checkbox"/> <a href="#">Stenotrophomonas</a> sp. 16S rRNA gene, isolate S3                                           | 2603      | 2603        | 100%        | 0.0     | 99.93%      | <a href="#">AJ002814.1</a> |
| <input type="checkbox"/> <a href="#">Stenotrophomonas maltophilia</a> strain JZFX-2 16S ribosomal RNA gene, partial sequence      | 2599      | 2599        | 99%         | 0.0     | 99.93%      | <a href="#">MF170829.1</a> |
| <input type="checkbox"/> <a href="#">Bacterium</a> strain YCR3A-3 16S ribosomal RNA gene, partial sequence                        | 2599      | 2599        | 99%         | 0.0     | 99.93%      | <a href="#">MF143454.1</a> |
| <input type="checkbox"/> <a href="#">Stenotrophomonas maltophilia</a> strain SBR01 16S ribosomal RNA gene, partial sequence       | 2597      | 2597        | 100%        | 0.0     | 99.86%      | <a href="#">KX018309.2</a> |
| <input type="checkbox"/> <a href="#">Stenotrophomonas maltophilia</a> strain IARI-ABL-34 16S ribosomal RNA gene, partial sequence | 2597      | 2597        | 100%        | 0.0     | 99.86%      | <a href="#">KC581677.1</a> |
| <input type="checkbox"/> <a href="#">Stenotrophomonas</a> sp. Bg1a partial 16S rRNA gene, isolate Bg1a                            | 2597      | 2597        | 100%        | 0.0     | 99.86%      | <a href="#">HF48402.1</a>  |
| <input type="checkbox"/> <a href="#">Stenotrophomonas maltophilia</a> strain KNUC2106 16S ribosomal RNA gene, partial sequence    | 2597      | 2597        | 100%        | 0.0     | 99.86%      | <a href="#">JN084034.1</a> |
| <input type="checkbox"/> <a href="#">Uncultured bacterium</a> clone 16slp101-2c06 p1k 16S ribosomal RNA gene, partial sequence    | 2597      | 2597        | 100%        | 0.0     | 99.86%      | <a href="#">GQ157164.1</a> |
| <input type="checkbox"/> <a href="#">Uncultured bacterium</a> clone 16slp101-3h04 p1k 16S ribosomal RNA gene, partial sequence    | 2597      | 2597        | 100%        | 0.0     | 99.86%      | <a href="#">GQ157162.1</a> |
| <input type="checkbox"/> <a href="#">Uncultured bacterium</a> clone 10A-13 16S ribosomal RNA gene, partial sequence               | 2597      | 2597        | 100%        | 0.0     | 99.86%      | <a href="#">DQ006850.1</a> |

**Tax BLAST report** [Taxonomy report description](#)

RID [9HZZH7AE015](#) (Expires on 03-26 17:31 pm)

Query ID [Id|Query\\_97843](#)

Description None

Molecule type nucleic acid

Query Length 1412

Database Name nr

Description Nucleotide collection (nt)

Program BLASTN 2.9.0+ [Citation](#)

**Lineage Report** [Organism Report](#) [Taxonomy Report](#)

| Organism                                | Blast Name      | Score | Number of Hits | Description                                              |
|-----------------------------------------|-----------------|-------|----------------|----------------------------------------------------------|
| Bacteria                                | bacteria        |       | 104            |                                                          |
| • Stenotrophomonas                      | g-roteobacteria |       | 88             |                                                          |
| • • Stenotrophomonas sp.                | g-roteobacteria | 2603  | 2              | <a href="#">Stenotrophomonas</a> sp. hits                |
| • • Stenotrophomonas sp. LY-2           | g-roteobacteria | 2603  | 1              | <a href="#">Stenotrophomonas</a> sp. LY-2 hits           |
| • • Stenotrophomonas maltophilia        | g-roteobacteria | 2603  | 28             | <a href="#">Stenotrophomonas maltophilia</a> hits        |
| • • Stenotrophomonas maltophilia R551-3 | g-roteobacteria | 2603  | 1              | <a href="#">Stenotrophomonas maltophilia</a> R551-3 hits |
| • • Stenotrophomonas sp. IARI-HHS2-27   | g-roteobacteria | 2603  | 1              | <a href="#">Stenotrophomonas</a> sp. IARI-HHS2-27 hits   |
| • Stenotrophomonas sp. KSR5             | g-roteobacteria | 2603  | 1              | <a href="#">Stenotrophomonas</a> sp. KSR5 hits           |

Figure S3.The 16S rDNA alignment of *S.maltophilia* 780

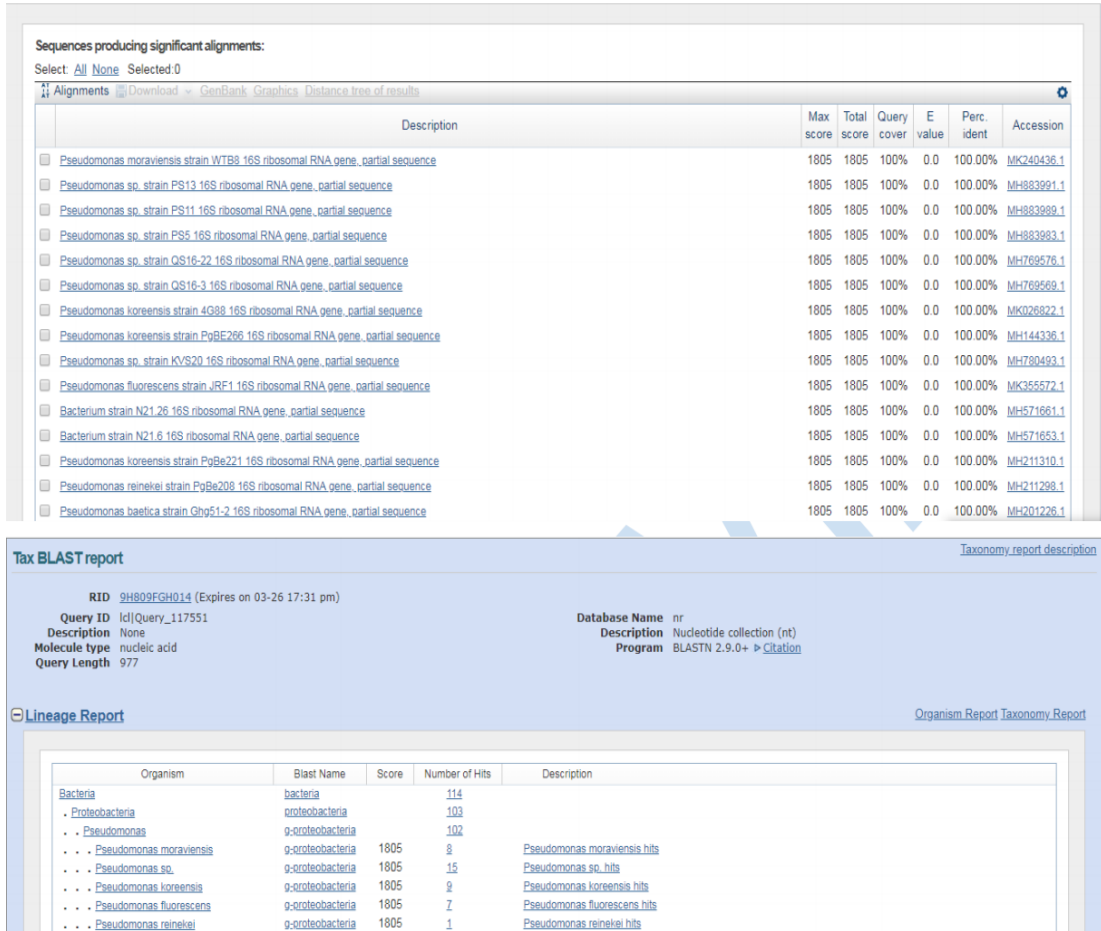

Figure. S4 The time course of the degradation of the recombinant CP4-EPSPS with extracellular proteases of *Pseudomonas* sp. 780

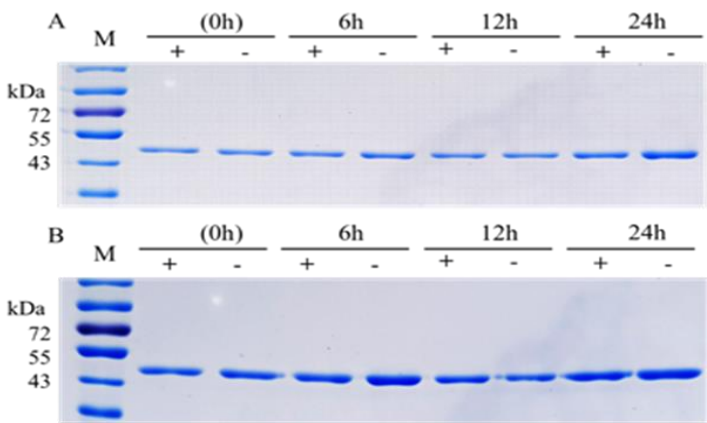

A. The degradation of 6×HIS-CP4-EPSPS; B. The degradation of CP4-EPSPS-6×HIS. (-): the negative control (degradation with supernatant of cell culture heated at 100°C for 30 min); (+) the extracellular proteases of *P.sp.* 780. M: protein molecular weight marker (the size of each band was indicated on the left).

**Table S2. The putative ORFs coding proteases and peptidases in *S.maltophilia* 780**

| ID                              | E-value   | Description                                                                                      |
|---------------------------------|-----------|--------------------------------------------------------------------------------------------------|
| gi 692316381 ref WP_032127221.1 | 1.30E-124 | peptidase [ <i>Stenotrophomonas maltophilia</i> ]                                                |
| gi 501502945 ref WP_012511135.1 | 9.10E-301 | peptidase S15 [ <i>Stenotrophomonas maltophilia</i> R551-3]                                      |
| gi 916992288 ref WP_051599000.1 | 0.00E+00  | peptidase C39 [ <i>Stenotrophomonas rhizophila</i> ]                                             |
| gi 504459148 ref WP_014646250.1 | 4.00E-290 | peptidase M20 [ <i>Stenotrophomonas maltophilia</i> ]                                            |
| gi 896534951 ref WP_049437628.1 | 9.70E-178 | peptidase [ <i>Stenotrophomonas maltophilia</i> ]                                                |
| gi 501501736 ref WP_012509956.1 | 0.00E+00  | peptidase M14 carboxypeptidase A [ <i>Stenotrophomonas maltophilia</i> R551-3]                   |
| gi 515925935 ref WP_017356518.1 | 0.00E+00  | peptidase M13 [ <i>Stenotrophomonas maltophilia</i> ]                                            |
| gi 501501696 ref WP_012509917.1 | 0.00E+00  | peptidase M28 [ <i>Stenotrophomonas maltophilia</i> R551-3]                                      |
| gi 754363485 ref WP_041864589.1 | 1.10E-160 | peptidase S41 [ <i>Stenotrophomonas maltophilia</i> ]                                            |
| gi 896596053 ref WP_049480189.1 | 1.40E-232 | Xaa-Pro aminopeptidase [ <i>Stenotrophomonas maltophilia</i> ]                                   |
| gi 760006256 ref WP_043689563.1 | 8.10E-145 | D-alanyl-D-alanine endopeptidase [ <i>Luteimonas huabeiensis</i> ]                               |
| gi 489189576 ref WP_003098955.1 | 1.30E-91  | Lipoprotein signal peptidase [ <i>Pseudomonas aeruginosa</i> ]                                   |
| gi 758873846 ref WP_043034335.1 | 4.50E-281 | carboxypeptidase C (Cathepsin A) [ <i>Stenotrophomonas maltophilia</i> WJ66]                     |
| gi 896525868 ref WP_049429646.1 | 0.00E+00  | peptidase [ <i>Stenotrophomonas maltophilia</i> ]                                                |
| gi 896504914 ref WP_049412562.1 | 0.00E+00  | peptidase M20 [ <i>Stenotrophomonas maltophilia</i> ]                                            |
| gi 491557240 ref WP_005414827.1 | 0.00E+00  | Dipeptidyl peptidase IV [ <i>Stenotrophomonas maltophilia</i> EPM1]                              |
| gi 896551079 ref WP_049451894.1 | 1.20E-233 | metalloendopeptidase [ <i>Stenotrophomonas maltophilia</i> ]                                     |
| gi 896545089 ref WP_049446379.1 | 3.40E-142 | Methionine aminopeptidase [ <i>Stenotrophomonas maltophilia</i> ]                                |
| gi 896525822 ref WP_049429600.1 | 0.00E+00  | peptidase [ <i>Stenotrophomonas maltophilia</i> ]                                                |
| gi 475058159 emb CCP15559.1     | 7.90E-308 | Plasma glutamate carboxypeptidase Flags: Precursor<br>[ <i>Stenotrophomonas maltophilia</i> RA8] |
| gi 493427208 ref WP_006382890.1 | 8.80E-151 | Signal peptidase I [ <i>Stenotrophomonas maltophilia</i> RA8]                                    |
| gi 896551216 ref WP_049451966.1 | 1.60E-248 | peptidase PmbA [ <i>Stenotrophomonas maltophilia</i> ]                                           |
| gi 757859886 gb KIS38398.1      | 6.10E-102 | endopeptidase YdhO [ <i>Stenotrophomonas maltophilia</i> WJ66]                                   |
| gi 922916199 gb KOO79758.1      | 0.00E+00  | peptidase M13 [ <i>Stenotrophomonas maltophilia</i> ]                                            |

|                                 |           |                                                                                                 |
|---------------------------------|-----------|-------------------------------------------------------------------------------------------------|
| gi 612088648 gb EZIP47245.1     | 0.00E+00  | putative endopeptidase [ <i>Stenotrophomonas sp. RIT309</i> ]                                   |
| gi 612085737 gb EZIP44404.1     | 0.00E+00  | Dipeptidyl-peptidase [ <i>Stenotrophomonas sp. RIT309</i> ]                                     |
| gi 501503487 ref WP_012511663.1 | 1.40E-168 | peptidase M48 Ste24p [ <i>Stenotrophomonas maltophilia R551-3</i> ]                             |
| gi 696407508 ref WP_032978712.1 | 2.80E-147 | Peptidase [ <i>Stenotrophomonas sp. RIT309</i> ]                                                |
| gi 815697551 ref WP_046431082.1 | 2.10E-172 | peptidase [ <i>Stenotrophomonas maltophilia</i> ]                                               |
| gi 501503155 ref WP_012511339.1 | 1.30E-92  | peptidase A24A prepilin type IV [ <i>Stenotrophomonas maltophilia R551-3</i> ]                  |
| gi 498166821 ref WP_010480977.1 | 0.00E+00  | peptidase S41 [ <i>Stenotrophomonas maltophilia</i> ]                                           |
| gi 922919146 gb KOO82692.1      | 4.80E-181 | peptidase [ <i>Stenotrophomonas maltophilia</i> ]                                               |
| gi 759684756 ref WP_043401703.1 | 1.20E-98  | peptidase [ <i>Stenotrophomonas maltophilia</i> ]                                               |
| gi 501501432 ref WP_012509656.1 | 0.00E+00  | peptidase M56 BlaR1 [ <i>Stenotrophomonas maltophilia R551-3</i> ]                              |
| gi 504458374 ref WP_014645476.1 | 1.10E-251 | peptidase C69 [ <i>Stenotrophomonas maltophilia</i> ]                                           |
| gi 740905942 ref WP_038691190.1 | 0.00E+00  | dipeptidyl carboxypeptidase II [ <i>Stenotrophomonas rhizophila</i> ]                           |
| gi 896565148 ref WP_049461671.1 | 9.80E-113 | signal peptidase I [ <i>Stenotrophomonas maltophilia</i> ]                                      |
| gi 501503709 ref WP_012511878.1 | 1.90E-120 | peptidase M22 glycoprotease [ <i>Stenotrophomonas maltophilia R551-3</i> ]                      |
| gi 501503686 ref WP_012511856.1 | 8.90E-160 | Peptidase M23 [ <i>Stenotrophomonas maltophilia R551-3</i> ]                                    |
| gi 194350216 gb ACF53339.1      | 6.30E-133 | Serine-type D-Ala-D-Ala carboxypeptidase [ <i>Stenotrophomonas maltophilia R551-3</i> ]         |
| gi 501501639 ref WP_012509860.1 | 3.60E-106 | peptidase M15D vanX D-ala-D-ala dipeptidase [ <i>Stenotrophomonas maltophilia R551-3</i> ]      |
| gi 490240882 ref WP_004139140.1 | 7.60E-270 | Endopeptidase ykfC [ <i>Stenotrophomonas maltophilia RA8</i> ]                                  |
| gi 896553556 ref WP_049453837.1 | 0.00E+00  | peptidase S8 [ <i>Stenotrophomonas maltophilia</i> ]                                            |
| gi 896549217 ref WP_049450159.1 | 6.10E-189 | peptidase M23 [ <i>Stenotrophomonas maltophilia</i> ]                                           |
| gi 922921281 gb KOO84819.1      | 2.10E-183 | proline iminopeptidase [ <i>Stenotrophomonas maltophilia</i> ]                                  |
| gi 501504211 ref WP_012512377.1 | 0.00E+00  | peptidase M3A and M3B thimet/oligopeptidase F<br>[ <i>Stenotrophomonas maltophilia R551-3</i> ] |
| gi 756166387 ref WP_042614603.1 | 8.90E-255 | aminopeptidase [ <i>Stenotrophomonas maltophilia</i> ]                                          |
| gi 647597629 ref WP_025874228.1 | 0.00E+00  | peptidase [ <i>Stenotrophomonas maltophilia</i> ]                                               |

|                                 |           |                                                                                                              |
|---------------------------------|-----------|--------------------------------------------------------------------------------------------------------------|
| gi 692317689 ref WP_032128510.1 | 2.10E-147 | peptidase [ <i>Stenotrophomonas maltophilia</i> ]                                                            |
| gi 692317678 ref WP_032128499.1 | 2.10E-231 | peptidase M19 [ <i>Stenotrophomonas maltophilia</i> ]                                                        |
| gi 501501962 ref WP_012510180.1 | 6.90E-235 | peptidyl-Asp metalloendopeptidase [ <i>Stenotrophomonas maltophilia</i><br><i>R551-3</i> ]                   |
| gi 692318258 ref WP_032129064.1 | 0.00E+00  | dipeptidyl-peptidase 7 [ <i>Stenotrophomonas maltophilia</i> ]                                               |
| gi 815699437 ref WP_046432751.1 | 0.00E+00  | endopeptidase IV [ <i>Stenotrophomonas maltophilia</i> ]                                                     |
| gi 896549036 ref WP_049450010.1 | 2.10E-270 | cytosol aminopeptidase [ <i>Stenotrophomonas maltophilia</i> ]                                               |
| gi 896524539 ref WP_049428541.1 | 0.00E+00  | peptidase M61 [ <i>Stenotrophomonas maltophilia</i> ]                                                        |
| gi 896531560 ref WP_049434638.1 | 7.40E-98  | peptidase A8 [ <i>Stenotrophomonas maltophilia</i> ]                                                         |
| gi 647600489 ref WP_025877046.1 | 6.60E-120 | endopeptidase [ <i>Stenotrophomonas maltophilia</i> ]                                                        |
| gi 756165275 ref WP_042613527.1 | 0.00E+00  | peptidase M20 [ <i>Stenotrophomonas maltophilia</i> ]                                                        |
| gi 475058091 emb CCP15635.1     | 1.30E-106 | methionine aminopeptidase [ <i>Stenotrophomonas maltophilia</i> RA8]                                         |
| gi 493434413 ref WP_006389956.1 | 4.80E-106 | LON peptidase N-terminal domain and RING finger protein 2<br>[ <i>Stenotrophomonas maltophilia</i> RA8]      |
| gi 896545772 ref WP_049447062.1 | 2.50E-145 | peptidase [ <i>Stenotrophomonas maltophilia</i> ]                                                            |
| gi 896565889 ref WP_049462250.1 | 0.00E+00  | peptidase S46 [ <i>Stenotrophomonas maltophilia</i> ]                                                        |
| gi 896509486 ref WP_049416816.1 | 4.70E-258 | proline dipeptidase [ <i>Stenotrophomonas maltophilia</i> ]                                                  |
| gi 503804357 ref WP_014038351.1 | 1.30E-252 | peptidase M24B X-Pro dipeptidase/aminopeptidase domain protein<br>[ <i>Stenotrophomonas maltophilia</i> JV3] |
| gi 653607042 ref WP_027618358.1 | 4.80E-127 | peptidase S24 [ <i>Pseudomonas</i> sp. <i>URHB0015</i> ]                                                     |
| gi 491553502 ref WP_005411093.1 | 9.50E-96  | peptidase [ <i>Stenotrophomonas maltophilia</i> ]                                                            |
| gi 756166096 ref WP_042614321.1 | 0.00E+00  | peptidase [ <i>Stenotrophomonas maltophilia</i> ]                                                            |
| gi 922683161 gb ALA83957.1      | 0.00E+00  | prolyl oligopeptidase [ <i>Stenotrophomonas maltophilia</i> ]                                                |
| gi 515923736 ref WP_017354319.1 | 9.50E-213 | D-alanyl-D-alanine carboxypeptidase [ <i>Stenotrophomonas</i><br><i>maltophilia</i> ]                        |
| gi 756166822 ref WP_042615018.1 | 0.00E+00  | aminopeptidase [ <i>Stenotrophomonas maltophilia</i> ]                                                       |
| gi 922682389 gb ALA83185.1      | 0.00E+00  | dipeptidyl carboxypeptidase II [ <i>Stenotrophomonas maltophilia</i> ]                                       |
| gi 692318908 ref WP_032129696.1 | 0.00E+00  | aminoacyl peptidase [ <i>Stenotrophomonas maltophilia</i> ]                                                  |
| gi 501504117 ref WP_012512283.1 | 2.70E-281 | peptidase M56 BlaR1 [ <i>Stenotrophomonas maltophilia</i> <i>R551-3</i> ]                                    |

|                                 |           |                                                                                              |
|---------------------------------|-----------|----------------------------------------------------------------------------------------------|
| gi 896542396 ref WP_049443938.1 | 0.00E+00  | oligopeptidase A [ <i>Stenotrophomonas maltophilia</i> ]                                     |
| gi 896493993 ref WP_049402634.1 | 6.10E-262 | peptidase S41 [ <i>Stenotrophomonas maltophilia</i> ]                                        |
| gi 503801718 ref WP_014035712.1 | 0.00E+00  | peptidase M28 [ <i>Stenotrophomonas maltophilia</i> JV3]                                     |
| gi 501501832 ref WP_012510051.1 | 5.90E-178 | Peptidase M23 [ <i>Stenotrophomonas maltophilia</i> R551-3]                                  |
| gi 917542362 ref WP_052148779.1 | 1.50E-181 | proline iminopeptidase [ <i>Stenotrophomonas maltophilia</i> ]                               |
| gi 566142589 ref WP_024011406.1 | 1.60E-10  | peptidase [ <i>Pseudomonas moraviensis</i> R28-S]                                            |
| gi 917755073 ref WP_052269126.1 | 1.70E-200 | peptidase M42 [ <i>Pseudomonas fluorescens</i> ]                                             |
| gi 493413088 ref WP_006369023.1 | 9.60E-215 | Uncharacterized metalloprotease [ <i>Stenotrophomonas maltophilia</i> RA8]                   |
| gi 493412491 ref WP_006368434.1 | 0.00E+00  | protease domain-containing protein [ <i>Stenotrophomonas maltophilia</i> RA8]                |
| gi 746376602 ref WP_039420382.1 | 1.00E-169 | serine protease [ <i>Xanthomonas vesicatoria</i> ]                                           |
| gi 922918882 gb KOO82428.1      | 0.00E+00  | Clp protease ClpC [ <i>Stenotrophomonas maltophilia</i> ]                                    |
| gi 896276656 ref WP_049263841.1 | 1.10E-179 | Clp protease ClpC, partial [ <i>Pseudomonas aeruginosa</i> ]                                 |
| gi 758873988 ref WP_043034476.1 | 1.30E-275 | cysteine protease [ <i>Stenotrophomonas maltophilia</i> ]                                    |
| gi 896505601 ref WP_049413215.1 | 1.70E-200 | stomatin/prohibitin-family membrane protease subunit [ <i>Stenotrophomonas maltophilia</i> ] |
| gi 922682618 gb ALA83414.1      | 1.20E-267 | protease TldD [ <i>Stenotrophomonas maltophilia</i> ]                                        |
| gi 872686407 emb CRQ79460.1     | 5.20E-307 | protease TldD [ <i>Pseudomonas aeruginosa</i> ]                                              |
| gi 696406882 ref WP_032978097.1 | 0.00E+00  | Zinc protease [ <i>Stenotrophomonas</i> sp. RIT309]                                          |
| gi 493410619 ref WP_006366596.1 | 8.80E-57  | ATP-dependent Clp protease adapter protein clpS [ <i>Stenotrophomonas maltophilia</i> RA8]   |
| gi 740903143 ref WP_038688391.1 | 1.30E-147 | Clp protease ClpX [ <i>Stenotrophomonas rhizophila</i> ]                                     |
| gi 501503709 ref WP_012511878.1 | 1.90E-120 | peptidase M22 glycoprotease [ <i>Stenotrophomonas maltophilia</i> R551-3]                    |
| gi 515926406 ref WP_017356989.1 | 2.50E-41  | ATP-dependent Clp protease proteolytic subunit [ <i>Stenotrophomonas maltophilia</i> ]       |
| gi 495543884 ref WP_008268463.1 | 6.20E-300 | protease [ <i>Stenotrophomonas</i> sp. SKA14]                                                |
| gi 922686726 gb ALA91477.1      | 6.40E-155 | membrane protease HflC [ <i>Stenotrophomonas maltophilia</i> ]                               |



|                                 |           |                                                                                               |
|---------------------------------|-----------|-----------------------------------------------------------------------------------------------|
| gi 504459393 ref WP_014646495.1 | 6.80E-252 | zinc metalloprotease [ <i>Stenotrophomonas maltophilia</i> ]                                  |
| gi 872681110 emb CRR57107.1     | 1.90E-111 | Protease synthase and sporulation protein PAI 2 [ <i>Pseudomonas aeruginosa</i> ]             |
| gi 872680093 emb CRR70935.1     | 1.80E-117 | Protease production enhancer protein [ <i>Pseudomonas aeruginosa</i> ]                        |
| gi 740576582 ref WP_038362377.1 | 3.10E-205 | Clp protease ClpP [ <i>Pseudomonas chlororaphis</i> ]                                         |
| gi 493437803 ref WP_006393294.1 | 1.10E-216 | ATP-dependent protease ATP-binding subunit HslU<br>[ <i>Stenotrophomonas maltophilia</i> RA8] |
| gi 518167463 ref WP_019337671.1 | 9.70E-16  | ATP-dependent protease [ <i>Stenotrophomonas maltophilia</i> ]                                |
| gi 501503639 ref WP_012511810.1 | 4.10E-290 | protease Do [ <i>Stenotrophomonas maltophilia</i> R551-3]                                     |
| gi 490254907 ref WP_004152871.1 | 7.00E-134 | cell division protease FtsH [ <i>Stenotrophomonas maltophilia</i> RA8]                        |
| gi 748748842 ref WP_040006958.1 | 0.00E+00  | serine protease [ <i>Stenotrophomonas</i> sp. <i>SKA14</i> ]                                  |
| gi 219719191 gb EED37716.1      | 4.80E-106 | ATP-dependent zinc-metallo protease [ <i>Stenotrophomonas</i> sp. <i>SKA14</i> ]              |
| gi 647601653 ref WP_025878144.1 | 3.00E-121 | Lon protease [ <i>Stenotrophomonas</i> sp. <i>RIT309</i> ]                                    |
| gi 490248191 ref WP_004146319.1 | 1.00E-100 | ATP-dependent protease ATP-binding subunit ClpX<br>[ <i>Stenotrophomonas maltophilia</i> RA8] |
| gi 748192953 ref WP_039764045.1 | 8.60E-20  | Clp protease [ <i>Pseudomonas fluorescens</i> ]                                               |
| gi 734951378 ref WP_034151555.1 | 3.50E-48  | serine protease [ <i>Pseudomonas fluorescens</i> ]                                            |
